# Supplementary material for: CRISPR-Cas9 Knockdown and Induced Expression of CD133 Reveal Essential Roles in Melanoma Invasion and Metastasis
Source: PubMed Central journal article supplement (PMC6827046; doi:10.3390/cancers11101490), 2019-10-03
Supplement: cancers-11-01490-s001.pdf [file cancers-11-01490-s001.pdf]

## Supplementary Materials: CRISPR-Cas9 Knockdown and Induced Expression of CD133 Reveal Essential Roles in Melanoma Invasion and Metastasis

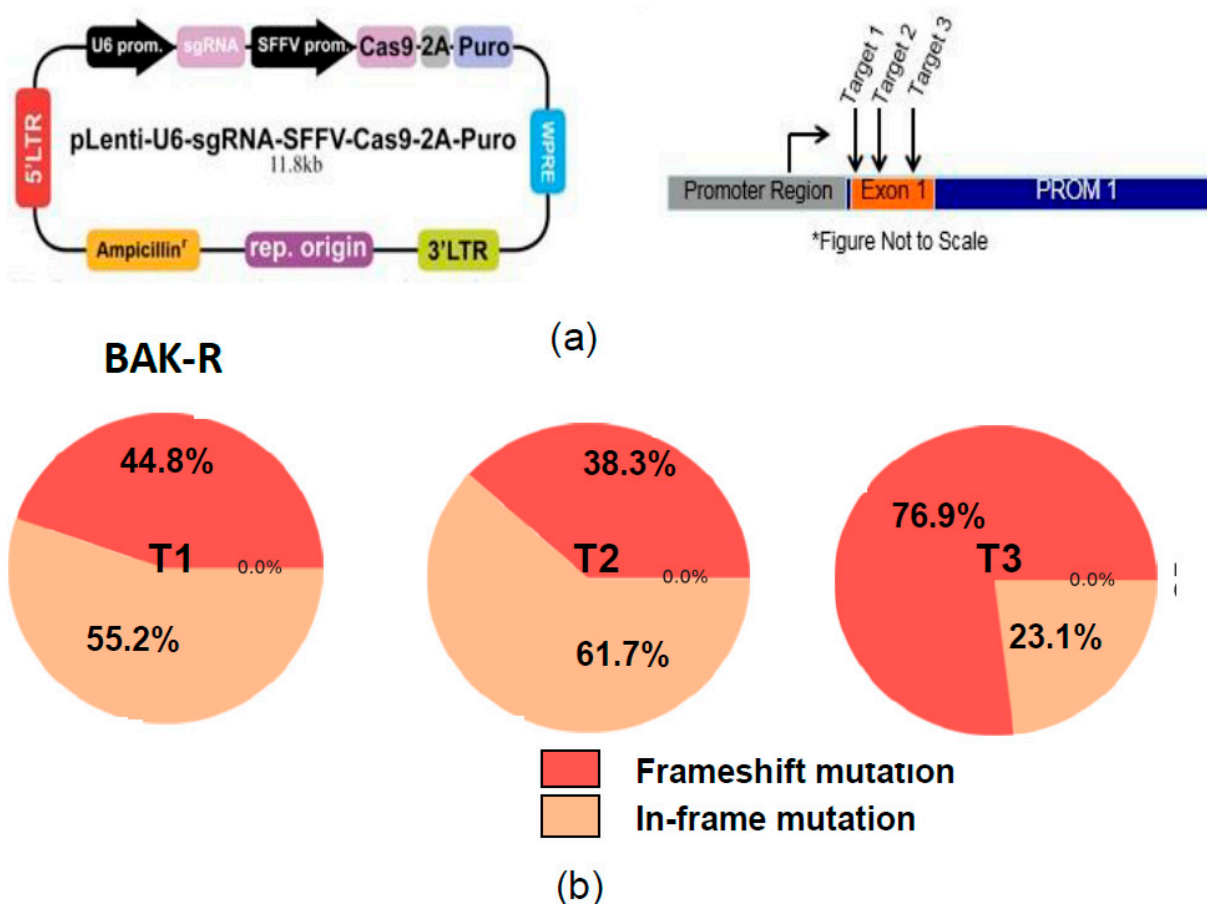

**FigureS1.** (a) CRISPR Cas9 pLenti plasmid from ABM and Gene Targets. pLenti plasmid (left) expresses Cas9 endonuclease and a puromycin resistance gene under control of the constitutively expressed spleen focus-forming virus (SFFV) promoter, and sgRNAs targeting three loci within exon 1 of the PROM1 gene (right) or scrambled sgRNA with no genomic targets, under control of the U6 promoter. (b) Frameshift mutation analysis from Next Generation Sequencing of BAK-R Scrambled control (SC), and BAK-R T1, T2, and T3 pooled clones.

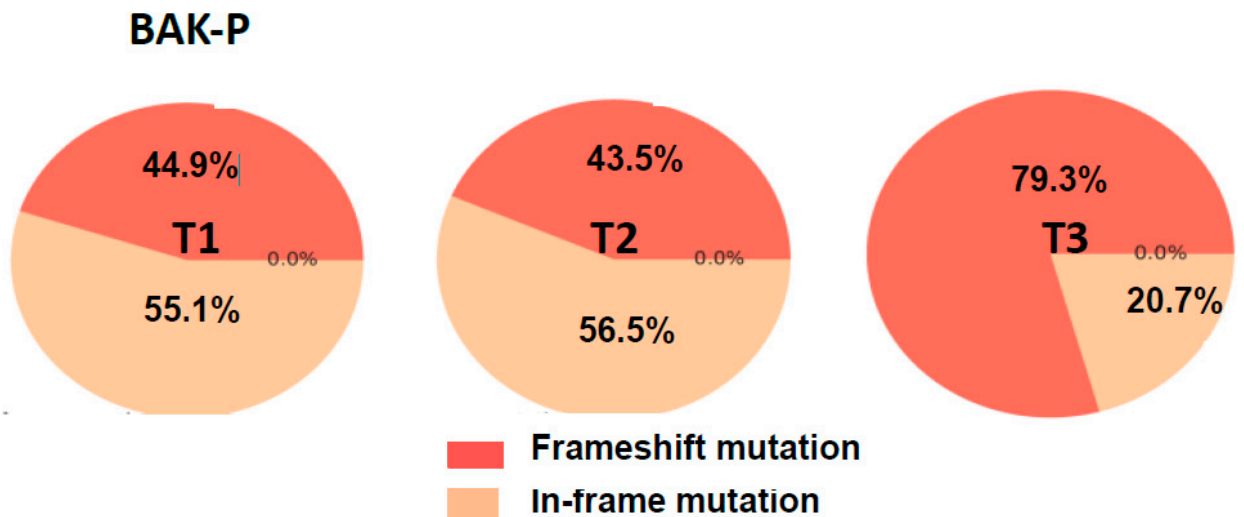

(a)

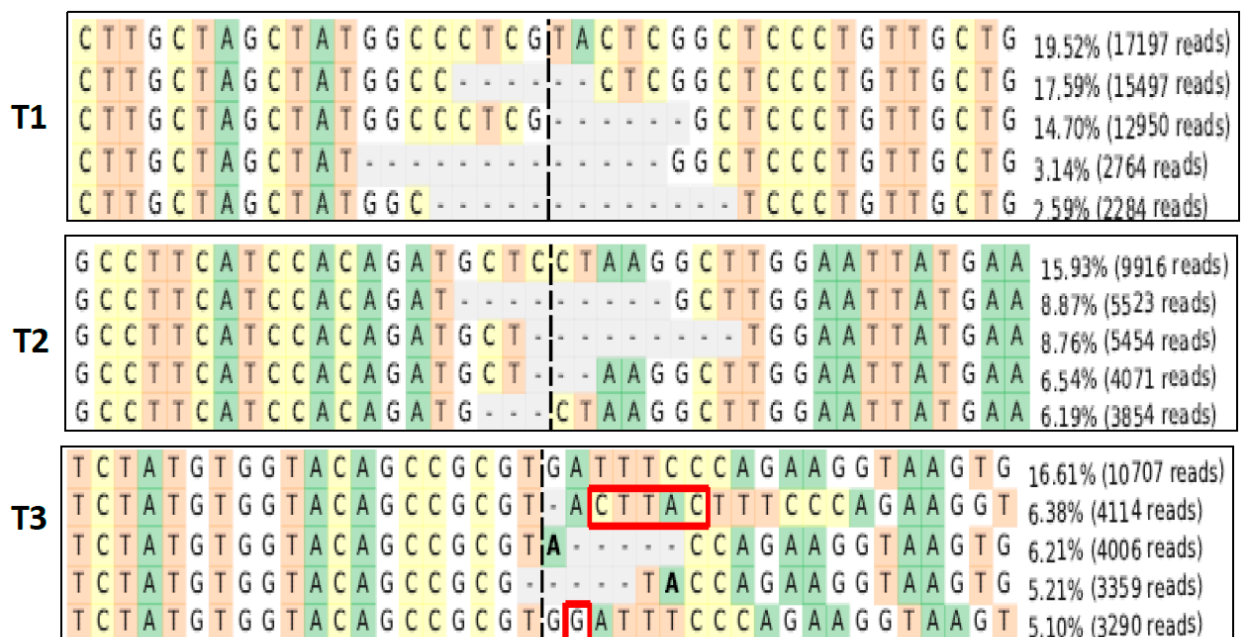

(b)

**Figure S2.** (a) Frameshift mutation analysis from Next Generation Sequencing and (b) visualization of allelic mutations at CRISPR target sites.

**Supplementary Material S3:** Scans of whole gel western blots showing molecular weight sizes of relevant proteins (indicated in arrows)

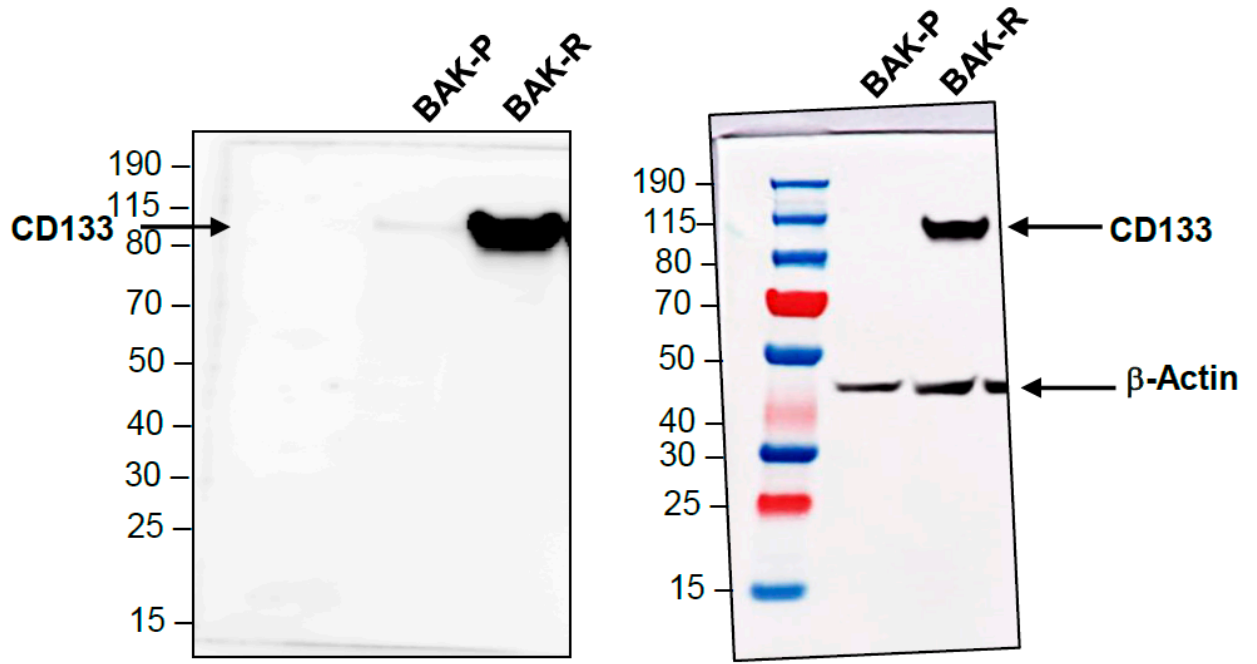

Fig. 1f whole gels

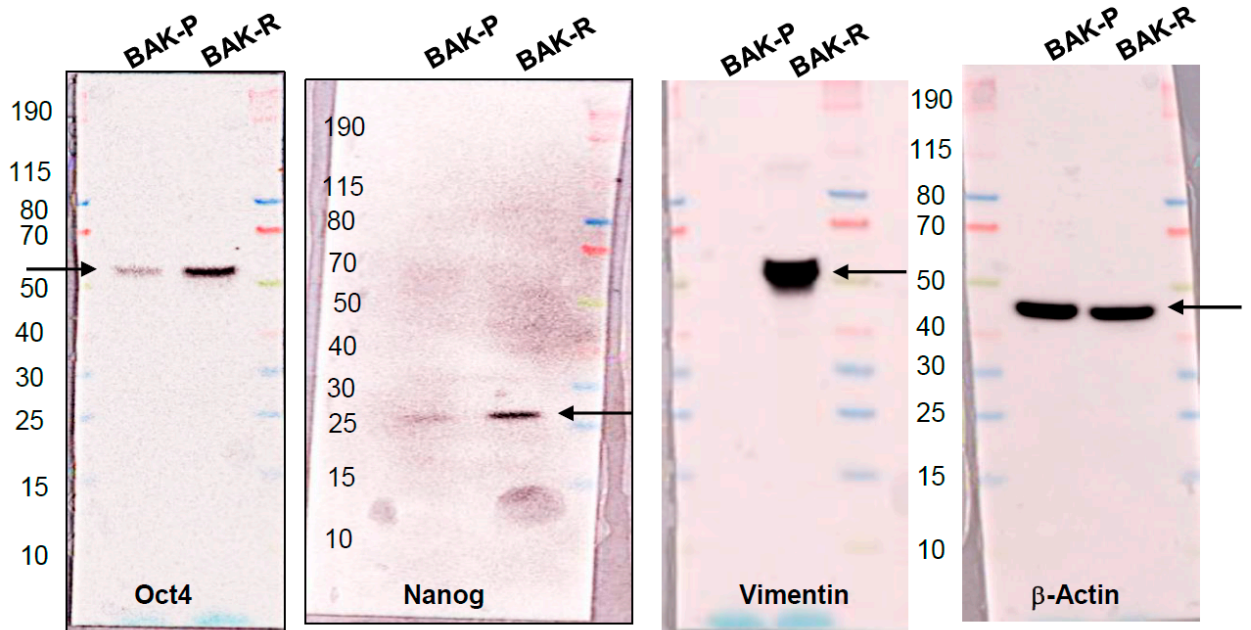

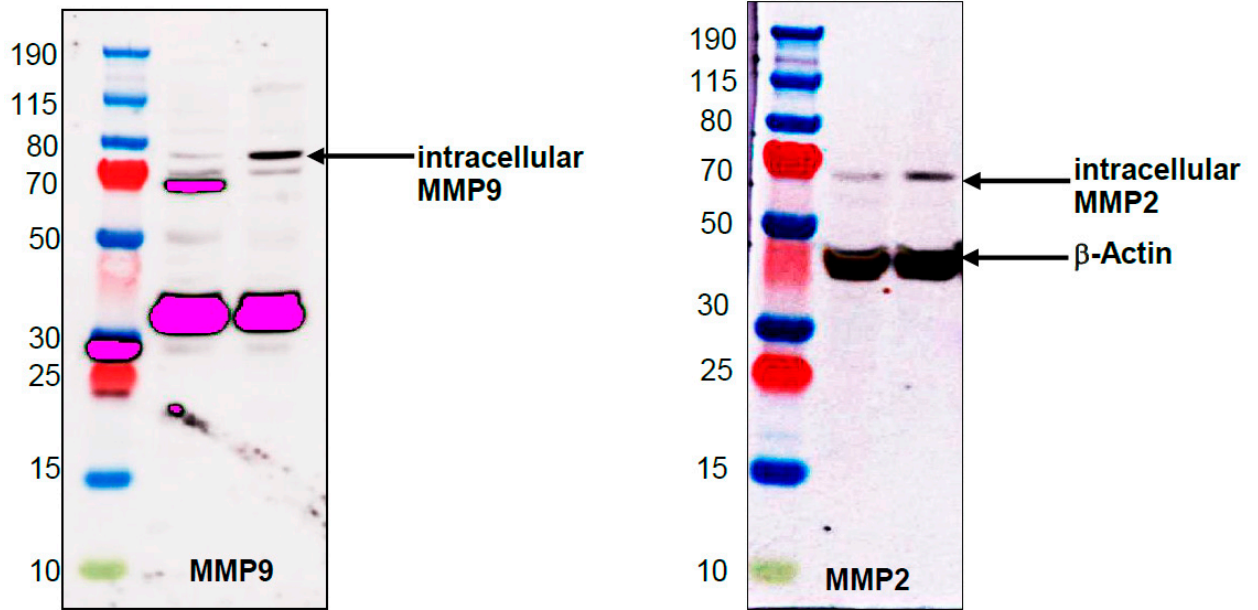

Fig. 2a whole gels

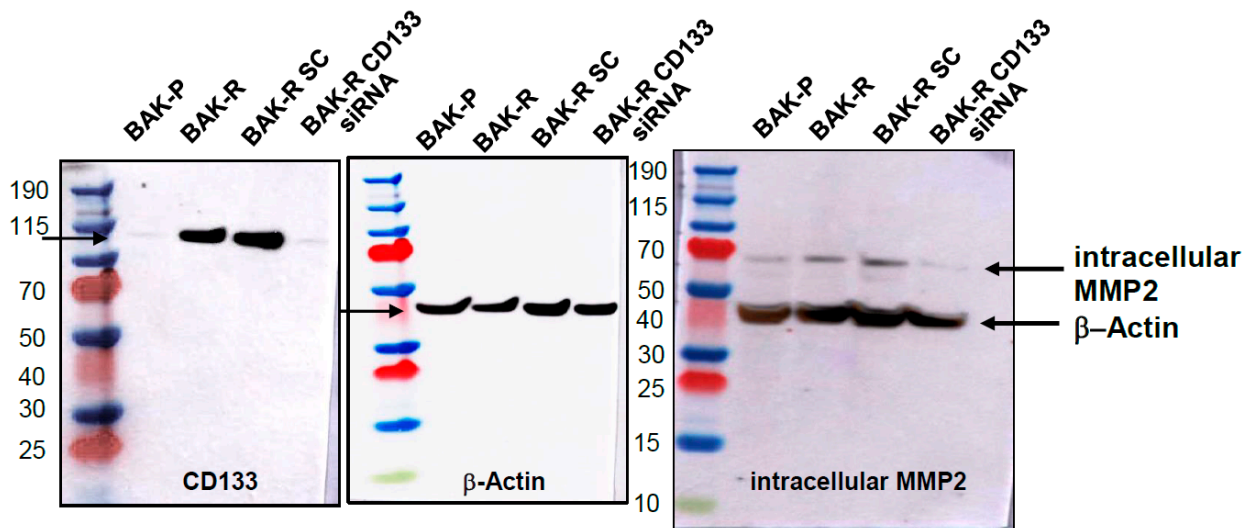

Fig. 3a whole gels

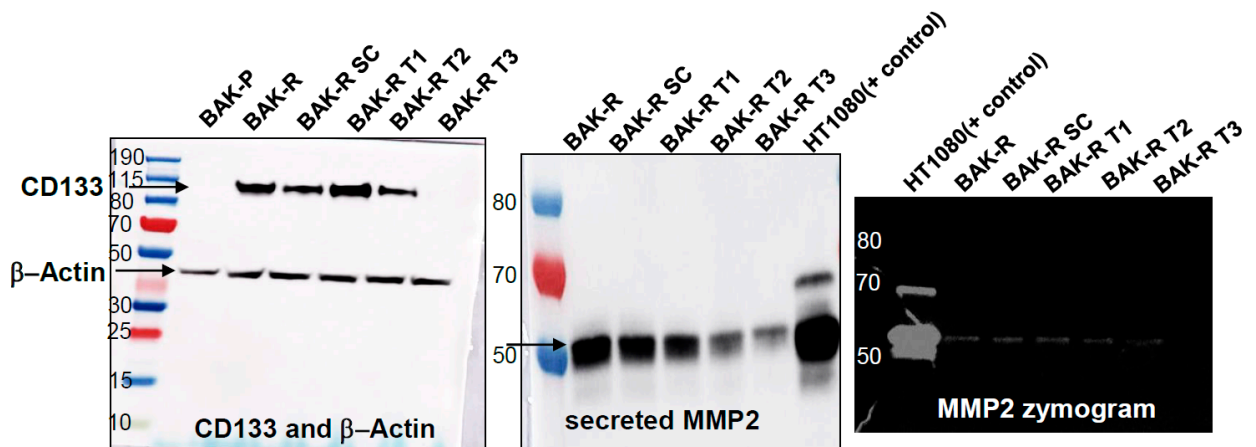

Fig. 4c whole gels

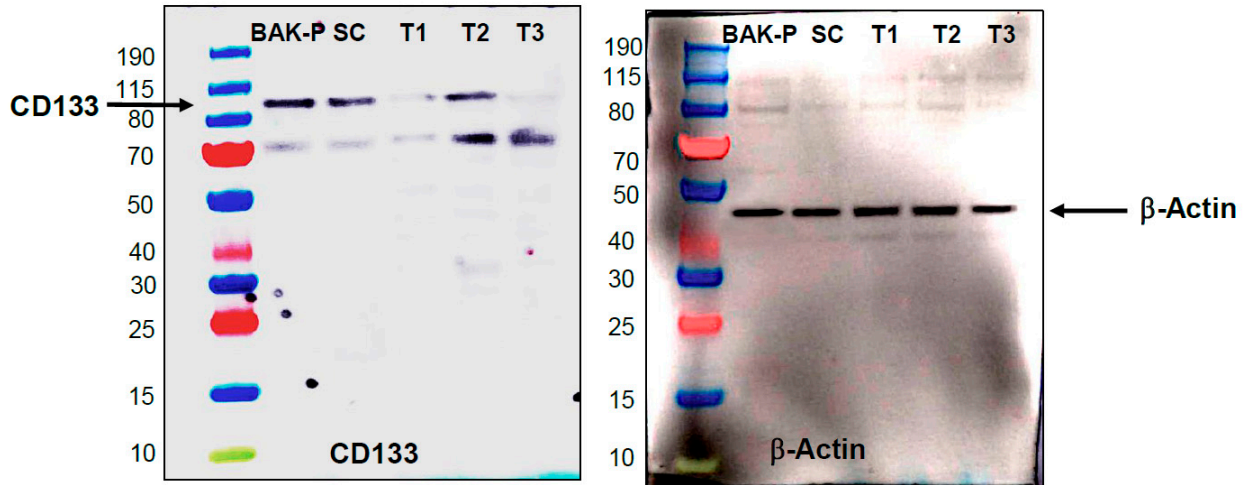

Fig. 5a whole gels

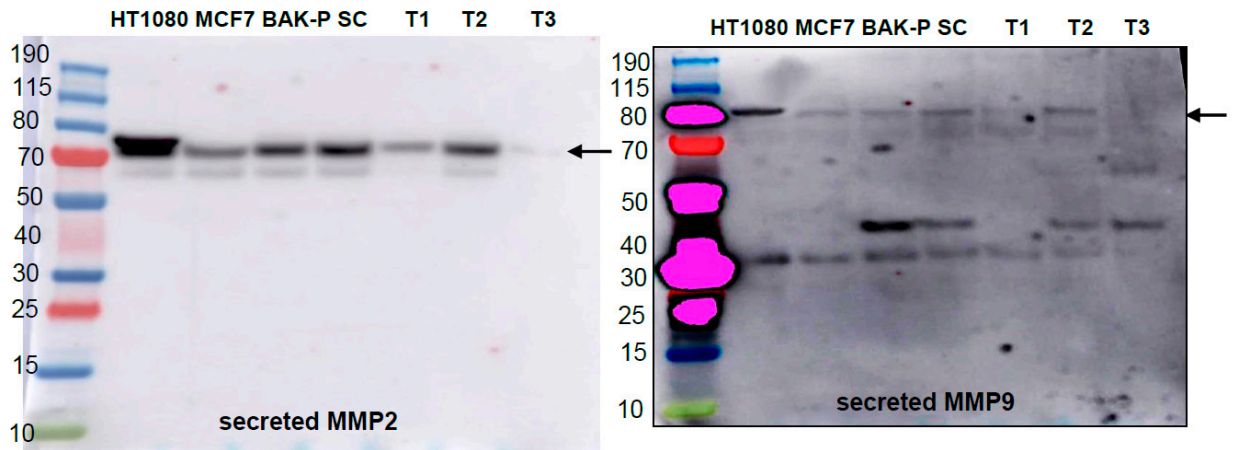

Fig. 5a whole gels

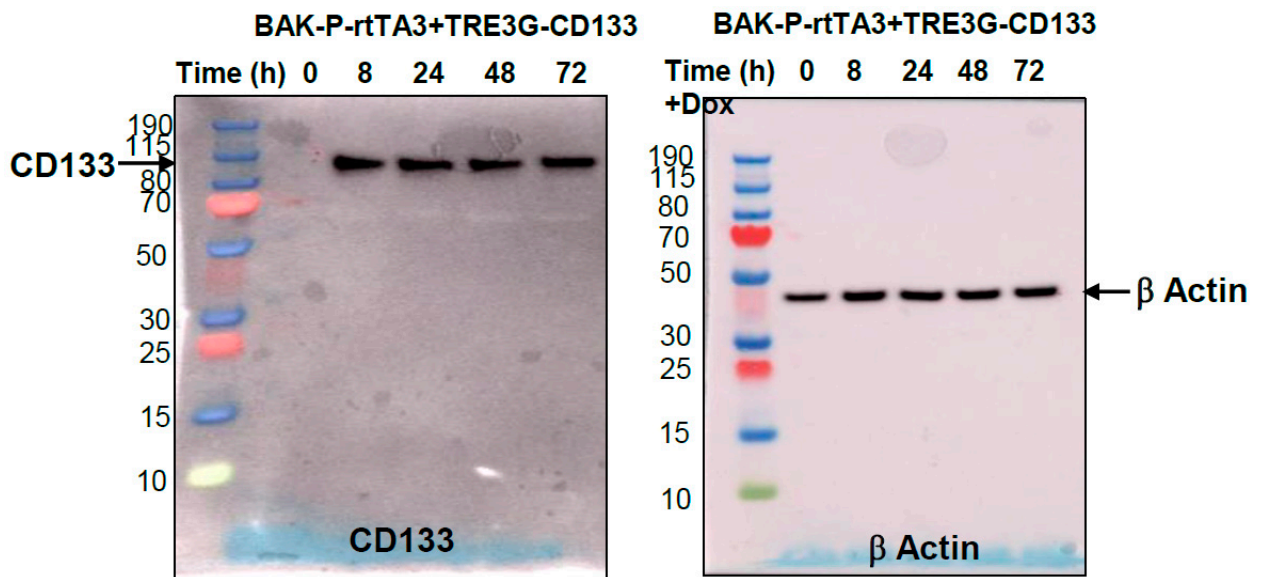

Fig. 6b whole gels

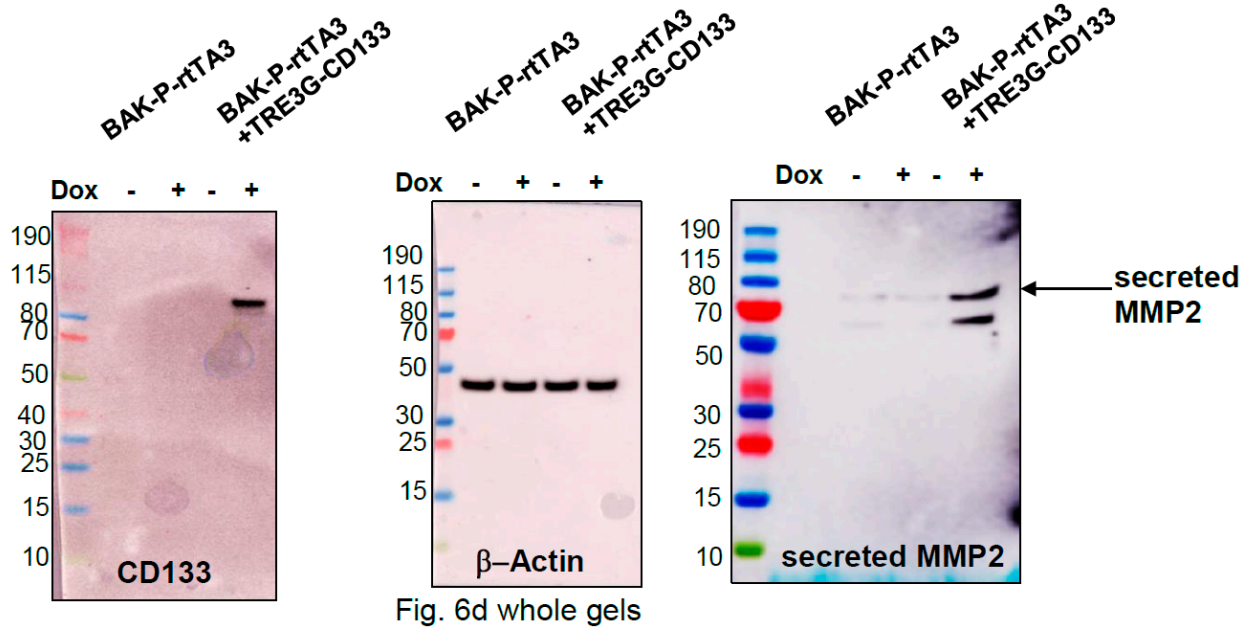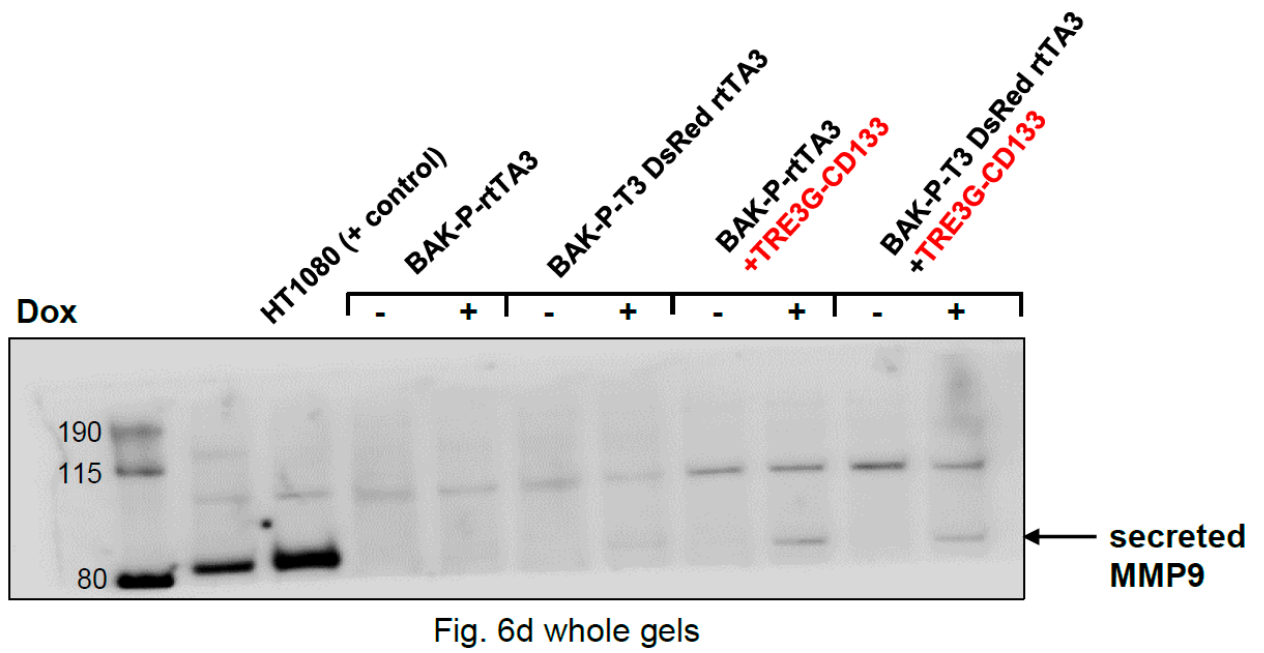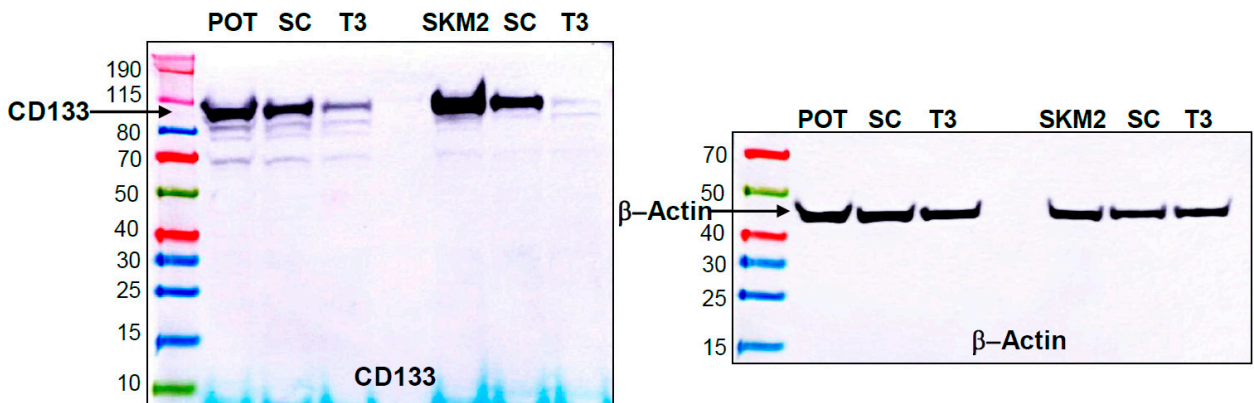

Supplementary Figure S3. Whole gel images for Figures 1f, 2a, 3a, 4c, 5a, 6b, 6d, 6f, and 6g.

Supplementary Materials S4: Densitometry analysis of western blots (band intensity normalized to loading control  $\beta$ -Actin; intensity ratio of each band relative to control are shown in tables)

**Figure 1f BAK-P BAK-R**

|       |     |      |
|-------|-----|------|
| CD133 | 1.0 | 14.3 |
|-------|-----|------|

| Figure 2a          | BAK-P BAK-R |       |
|--------------------|-------------|-------|
| CD133              | 1.0         | 14.3  |
| Oct4               | 1.0         | 7.0   |
| Nanog              | 1.0         | 1.9   |
| Vimentin           | 1.0         | 184.1 |
| Intracellular MMP9 | 1.0         | 13.3  |
| Intracellular MMP2 | 1.0         | 3.6   |

| Figure 3a          | BAK-P BAK-R | BAK-R SC BAK-R | CD133 siRNA |     |
|--------------------|-------------|----------------|-------------|-----|
| CD133              | 1.0         | 29.6           | 20.6        | 0.7 |
| Intracellular MMP2 | 1.0         | 2.0            | 1.6         | 0.1 |

| Figure 4c     | BAK-R | BAK-R SC BAK-R | T1 BAK-R | T2 BAK-R | T3  |
|---------------|-------|----------------|----------|----------|-----|
| CD133         | 1.0   | 0.7            | 0.9      | 0.5      | 0.1 |
| Secreted MMP2 | 1.0   | 0.8            | 0.6      | 0.3      | 0.1 |
| MMP2 Zymogram | 1.0   | 0.7            | 0.7      | 0.5      | 0.5 |

| Figure 5a     | BAK-P BAK-P | SC BAK-P | T1 BAK-P | T2 BAK-P | T3  |
|---------------|-------------|----------|----------|----------|-----|
| CD133         | 1.0         | 0.8      | 0.1      | 0.8      | 0.1 |
| Secreted MMP2 | 1.0         | 1.4      | 0.4      | 1.3      | 0.0 |
| Secreted MMP9 | 1.0         | 3.1      | 0.4      | 2.5      | 0.0 |

**Figure 6b BAK-P-rtTA3+TRE3G-CD133**

| Dox Induction (h) | 0   | 8     | 24    | 48    | 72    |
|-------------------|-----|-------|-------|-------|-------|
| CD133             | 1.0 | 268.0 | 194.4 | 175.6 | 310.4 |

| Figure 6d     | BAK-P-rtTA3 | BAK-P-rtTA3 | BAK-P-rtTA3          | BAK-P-rtTA3          |
|---------------|-------------|-------------|----------------------|----------------------|
|               | (- Dox)     | (+ Dox)     | +TRE3G-CD133 (- Dox) | +TRE3G-CD133 (+ Dox) |
| CD133         | 1.0         | 1.0         | 1.1                  | 815.7                |
| Secreted MMP2 | 1.0         | 59.2        | 52.6                 | 1238.5               |
| Secreted MMP9 | 1.0         | 1.2         | 1.2                  | 6.7                  |

**Figure 6f POT POT SC POT T3**

|       |     |     |     |
|-------|-----|-----|-----|
| CD133 | 1.0 | 0.6 | 0.2 |
|-------|-----|-----|-----|

**Figure 6g SK-MEL 2 SK-MEL 2 SC SK-MEL 2 T3**

|       |     |     |     |
|-------|-----|-----|-----|
| CD133 | 1.0 | 0.8 | 0.0 |
|-------|-----|-----|-----|
